# Supplementary material for: Active microbial sulfur cycling in 13,500-year-old lake sediments
Source: Copernicus journal article supplement (doi:10.5194/egusphere-2023-2102), 2023-10-05

## SUPPLEMENTARY TABLES and FIGURES

**Figure S1** | TOC and TOS content (left) and TIC and TIS content (right) in the sediment column of Lake Cadagno. The shaded regions denote the upper and lower sulfate depletion zones. Note the break in the y-axis.

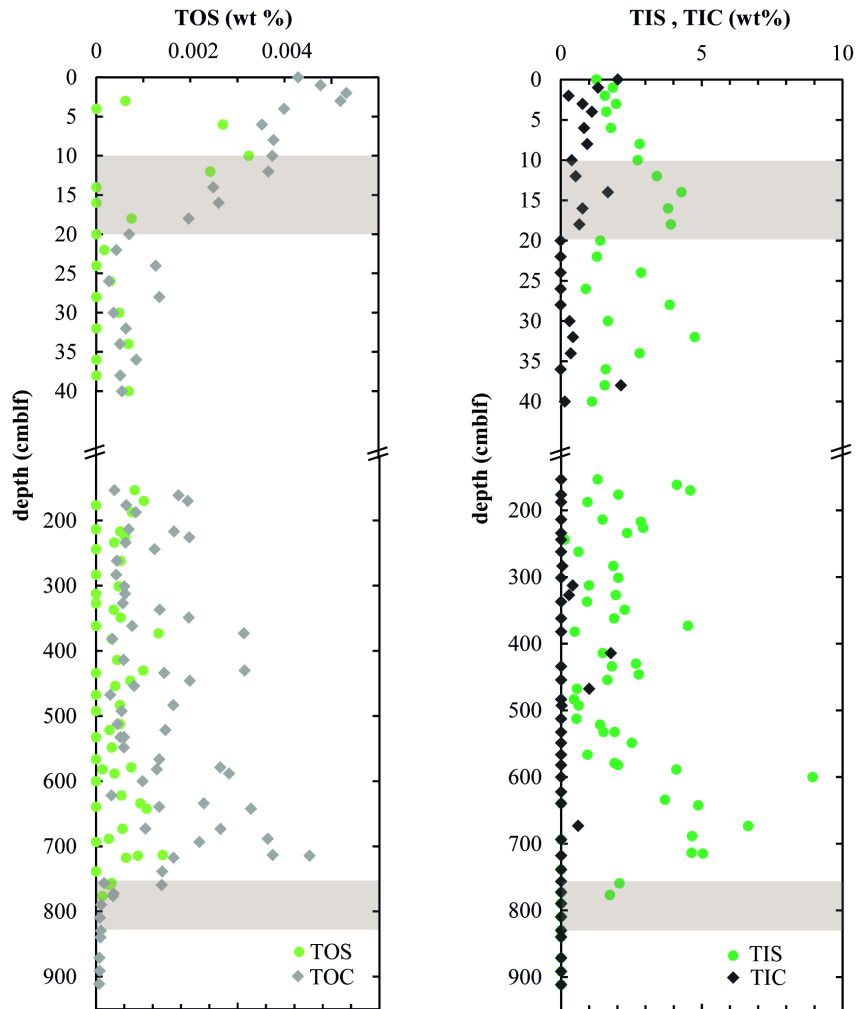

**Figure S2** |  $\delta^{34}\text{S}$  profiles of sulfide and sulfate measured in Lake Cadagno bottom waters and surface sediments in 1991.

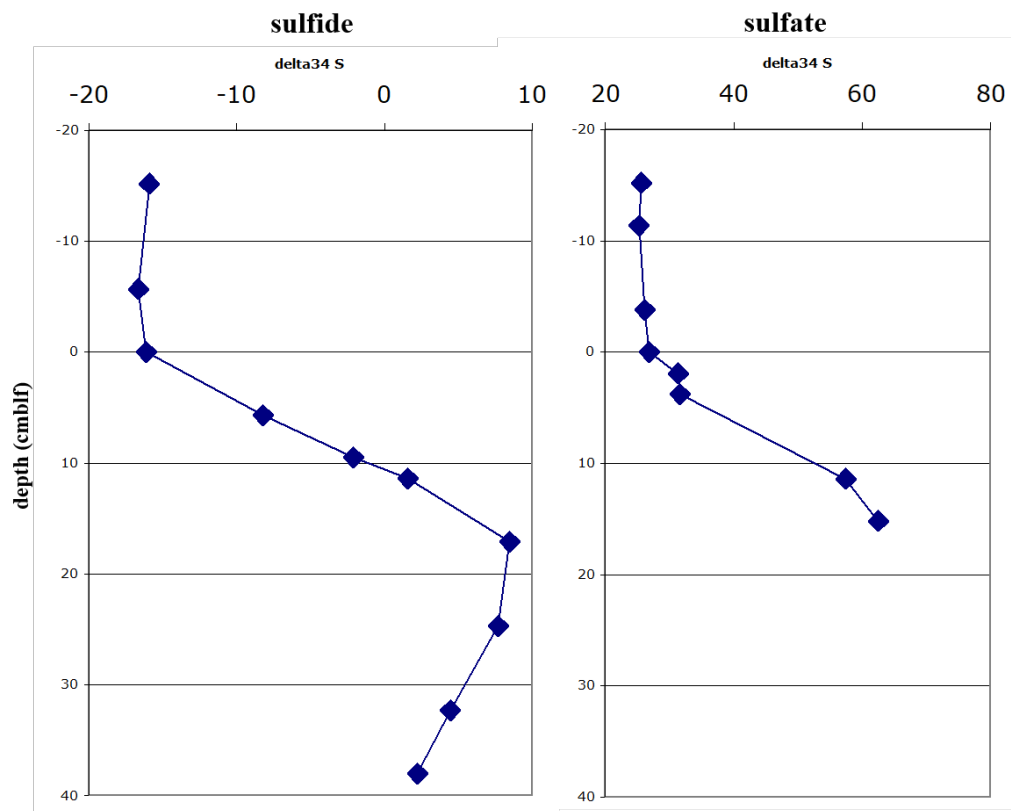

Supplement: Supplementary file 1 [file egusphere-2023-2102-supplement.pdf]
